# Supplementary material
Source: MDPI journal article supplement (https://www.mdpi.com/2075-163X/12/12/1561)
Supplement: s1 [file s1]

# Use of the Far Infrared Spectroscopy for NaCl and KCl Minerals Characterization—A Case Study of Halides from Kłodawa in Poland

Katarzyna Chruszcz-Lipska <sup>1,\*</sup>, Sylwia Zelek-Pogudz <sup>2</sup>, Urszula Solecka <sup>3</sup>, Marek Leszek Solecki <sup>1</sup>, Elżbieta Szostak <sup>4</sup>, Krzysztof Kazimierz Zborowski <sup>4</sup> and Michał Zając <sup>1</sup>

<sup>1</sup> Faculty of Drilling, Oil and Gas, AGH University of Science and Technology, 30-059 Kraków, Poland

<sup>2</sup> Faculty of Geology, Geophysics and Environmental Protection, AGH University of Science and Technology, 30-059 Kraków, Poland

<sup>3</sup> Faculty of Environmental Engineering and Land Surveying, University of Agriculture in Krakow, 30-059 Kraków, Poland

<sup>4</sup> Faculty of Chemistry, Jagiellonian University in Kraków, 30-387 Kraków, Poland

\* Correspondence: lipska@agh.edu.pl

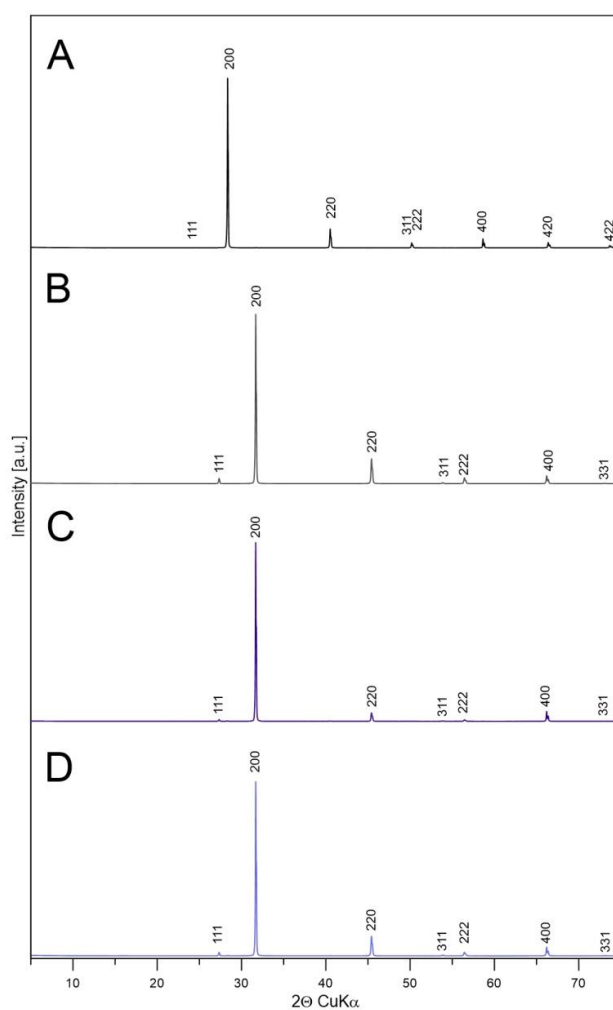

**Figure S1.** Experimental X-ray diffraction pattern of minerals: colorless sylvite (A), colorless halite (B), purple halite (C) and blue halite (D).

**Table S1.** Calculated IR Frequency and Intensity of T1u vibrational modes for 125-atom NaCl and KCl models (B3LYP/6-31g\*).

|    | NaCl                          |                        | KCl                           |                        |
|----|-------------------------------|------------------------|-------------------------------|------------------------|
|    | Frequency [cm <sup>-1</sup> ] | IR Intensity [KM/Mole] | Frequency [cm <sup>-1</sup> ] | IR Intensity [KM/Mole] |
| 1  | 48.7375                       | 1.4550                 | 34.8871                       | 0.6111                 |
| 2  | 73.6758                       | 0.0072                 | 56.3326                       | 0.3875                 |
| 3  | 84.7968                       | 1.0561                 | 60.0623                       | 1.3223                 |
| 4  | 88.5842                       | 4.6814                 | 61.5352                       | 1.3009                 |
| 5  | 93.1275                       | 1.6429                 | 72.0011                       | 0.1576                 |
| 6  | 97.1096                       | 1.4783                 | 73.6195                       | 0.2502                 |
| 7  | 106.7581                      | 3.0053                 | 80.1951                       | 0.5836                 |
| 8  | 113.6858                      | 9.3078                 | 86.4656                       | 10.0793                |
| 9  | 120.3571                      | 1.7680                 | 91.0570                       | 5.5522                 |
| 10 | 123.2576                      | 11.9396                | 97.1164                       | 1.6023                 |
| 11 | 130.2331                      | 7.7507                 | 102.9430                      | 1.4129                 |
| 12 | 136.3062                      | 1.0737                 | 106.4910                      | 3.4732                 |
| 13 | 140.3303                      | 9.9069                 | 108.0022                      | 1.7009                 |
| 14 | 143.1047                      | 5.1626                 | 112.1875                      | 63.1098                |
| 15 | 146.8878                      | 186.3441               | 113.8818                      | 70.9338                |
| 16 | 153.8113                      | 1.6411                 | 118.4101                      | 30.3330                |
| 17 | 161.8600                      | 51.7630                | 134.0071                      | 2.3555                 |
| 18 | 168.4465                      | 1.0132                 | 137.0255                      | 9.1089                 |
| 19 | 171.6719                      | 9.8683                 | 139.4639                      | 13.2024                |
| 20 | 176.3972                      | 22.7052                | 142.3388                      | 0.4886                 |
| 21 | 182.7580                      | 266.1723               | 143.9887                      | 181.8344               |
| 22 | 186.8098                      | 80.8524                | 150.1256                      | 11.7897                |
| 23 | 191.9967                      | 18.3741                | 152.1756                      | 196.8190               |
| 24 | 194.4425                      | 114.9770               | 154.3016                      | 10.5380                |
| 25 | 197.1484                      | 2.4169                 | 156.6175                      | 1.0833                 |
| 26 | 204.1634                      | 96.4358                | 159.6395                      | 10.0151                |
| 27 | 213.0107                      | 916.0933               | 163.6259                      | 403.9725               |
| 28 | 225.5459                      | 492.2016               | 173.6640                      | 735.1937               |
| 29 | 239.3126                      | 503.8864               | 188.1144                      | 548.701                |
